# Supplementary material
Source: PubMed Central journal article supplement (PMC5380474)
Supplement: NIHMS848517-supplement-Supp_data.pdf [file NIHMS848517-supplement-Supp_data.pdf]

**Supplemental Information for**

Mechanism of type-III protein secretion: Regulation of FlhA  
conformation by a functionally critical charged-residue cluster

**Marc Erhardt, Paige Wheatley, Eun A Kim, Takanori Hirano, Yang Zhang,  
Mayukh K. Sarkar, Kelly T. Hughes, and David F. Blair**











Figure S2. *Top*: FliP and FliQ mutations causing strong motility defects do not display dominant-negative effects. FliP mutations D197G, E178A, and K222A allow weak function; the other FliP mutations and the FliQ mutations give immotile phenotype. Wild-type (LT2) cells were transformed with salicylate-inducible plasmids expressing the indicated proteins. Induction with salicylate was at the levels indicated. Plates were incubated at 32° C for 5.5 h. *Bottom*: Relatively mild dominant-negative effects of five motility-abolishing FlhA mutations (Contrast with the strong dominance of R147A, R154A, and D158A mutations shown in Figure 2.)

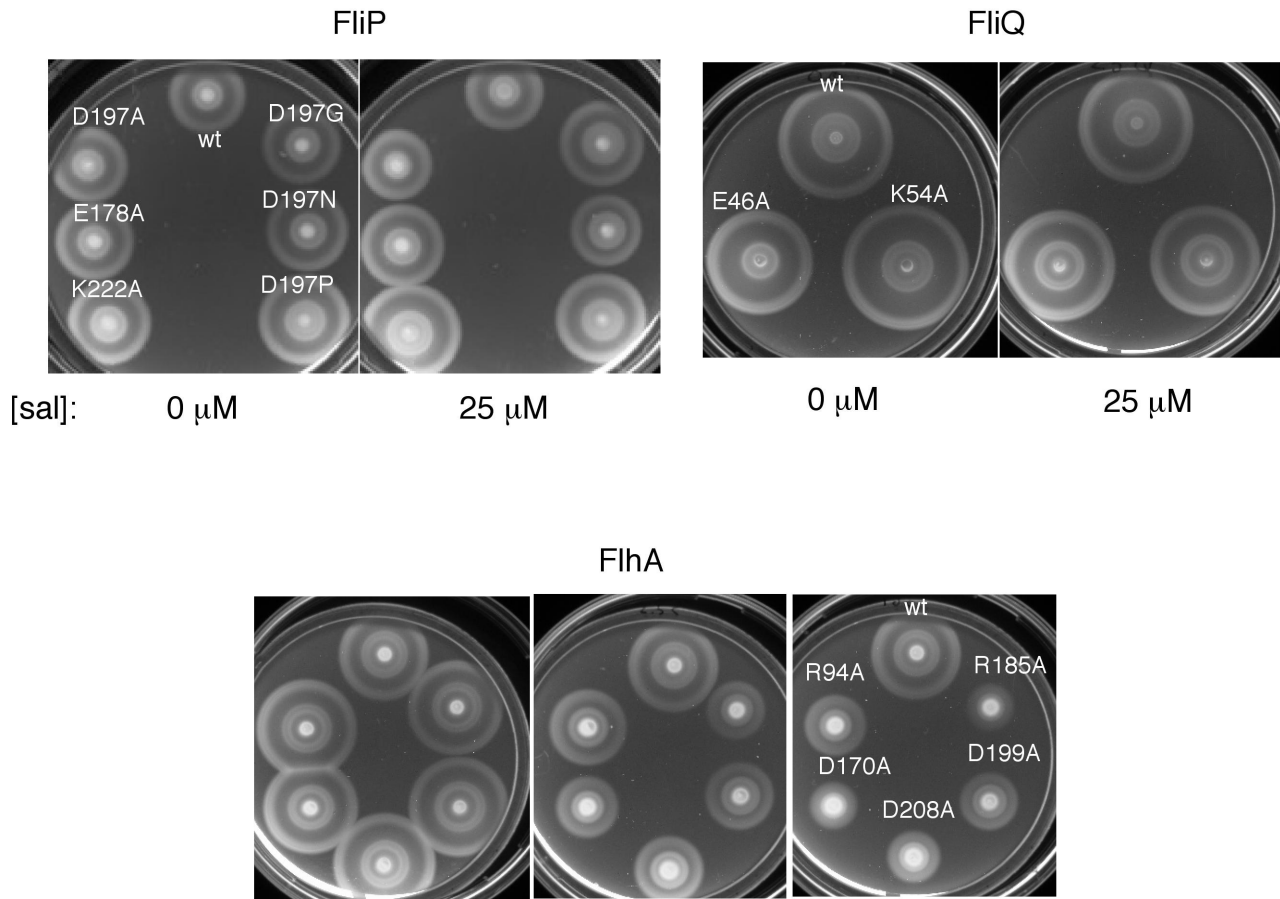

Figure S3. Enhanced motility of the FlhB D208A mutant upon moderate overexpression of FlhA. The background was TH12644, transformed with a derivative of pMS123 carrying the D208A mutation, together with the IPTG-regulated FlhA-expressing plasmid pEK1007. The plate contained chloramphenicol and ampicillin (50  $\mu\text{g}/\text{m}$  each), 2.5  $\mu\text{M}$  sodium salicylate to induce the mutant FlhB, and 50  $\mu\text{M}$  IPTG to induce FlhA. The plate was spotted with 3  $\mu\text{l}$  drops of overnight cultures and incubated for 6 h at 32 $^{\circ}$  C.

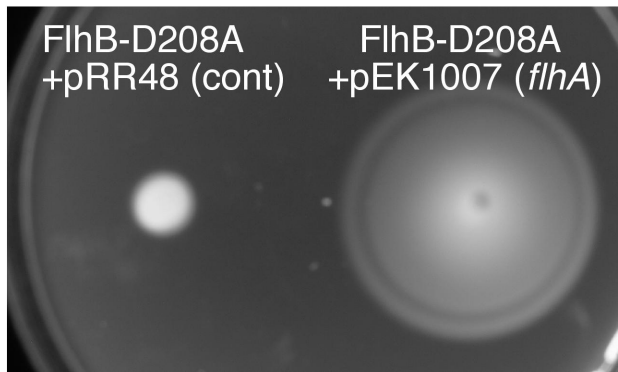



Figure S4. (A) Comparison of levels of w.t. and mutant FlhA proteins in mid-logarithmic phase cells, with expression induced at various levels by sodium salicylate. Cultures were grown in LB at 37° C. FlhA was detected using rabbit polyclonal antibody, a gift of T. Minamino. (B) Expression of wild-type and mutant FlhA proteins at various phases of growth. (C) Absence of any growth defect upon expression of the mutant FlhA proteins. In each panel, one of the mutant variants is compared with the wild type (the same for all panels). *unind*, not induced; *ind*, induced with 10  $\mu$ M sodium salicylate.

A

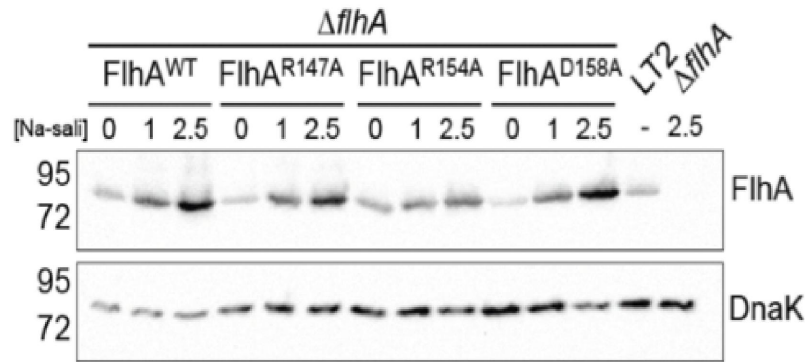

B

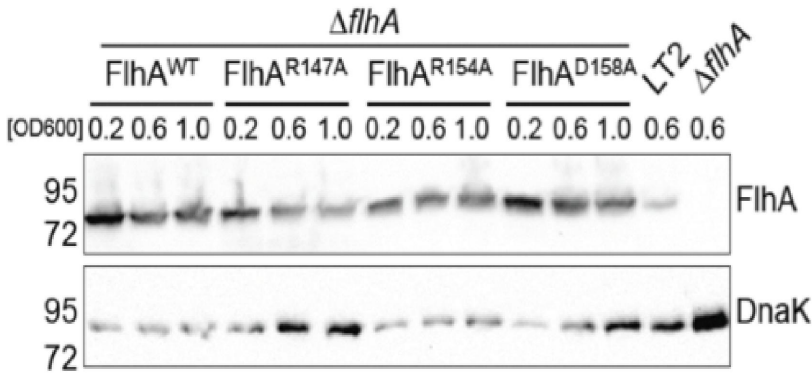

C

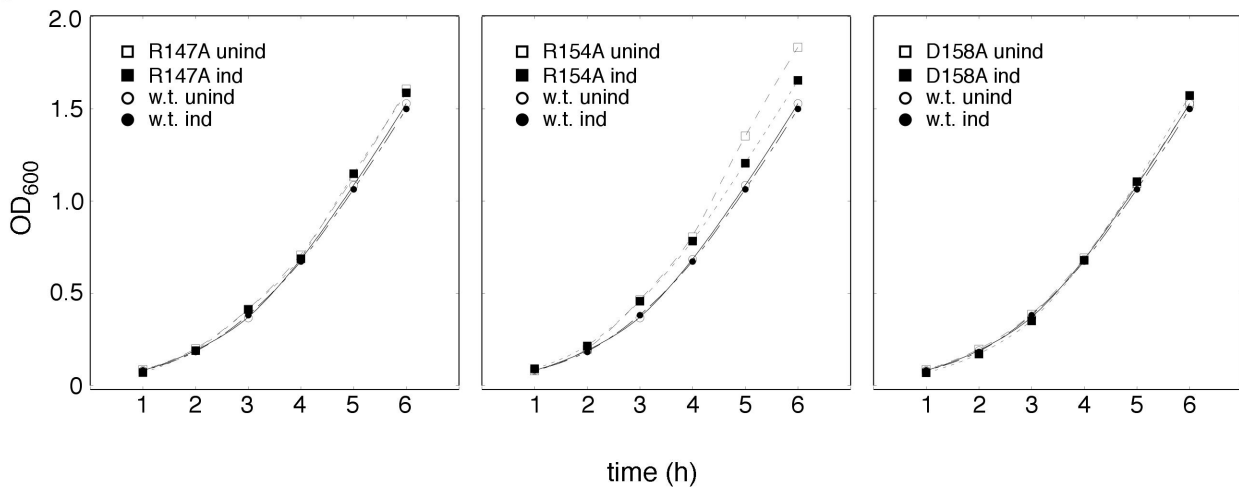



Figure S6. Additional crosslinking and proteolysis experiments. (A) Crosslinking experiment in a  $\Delta flhDC$  strain, which expresses no flagellar genes from the chromosome. The  $\Delta flhA$  strain is shown for comparison. Cys residues were present at positions 170 and 185 in all lanes. The experiment used a 7.5% acrylamide gel with a 1:70 bis:acrylamide ratio. (B) Effect of detergent (0.05% Triton X-100). The Cys170/Cys185 FlhA protein was expressed in the  $\Delta flhA$  background. Triton was added either after crosslinking (a), or before (b), as indicated. Although yield of the highest-MW products is decreased by Triton, product as large as heptamer is still observed (and dimer and trimer intensity is increased). The experiment used a 4%-20% gradient gel. (C) Limited-proteolysis experiment like that in Figure 7 except carried out in the  $\Delta flhDC$  strain.

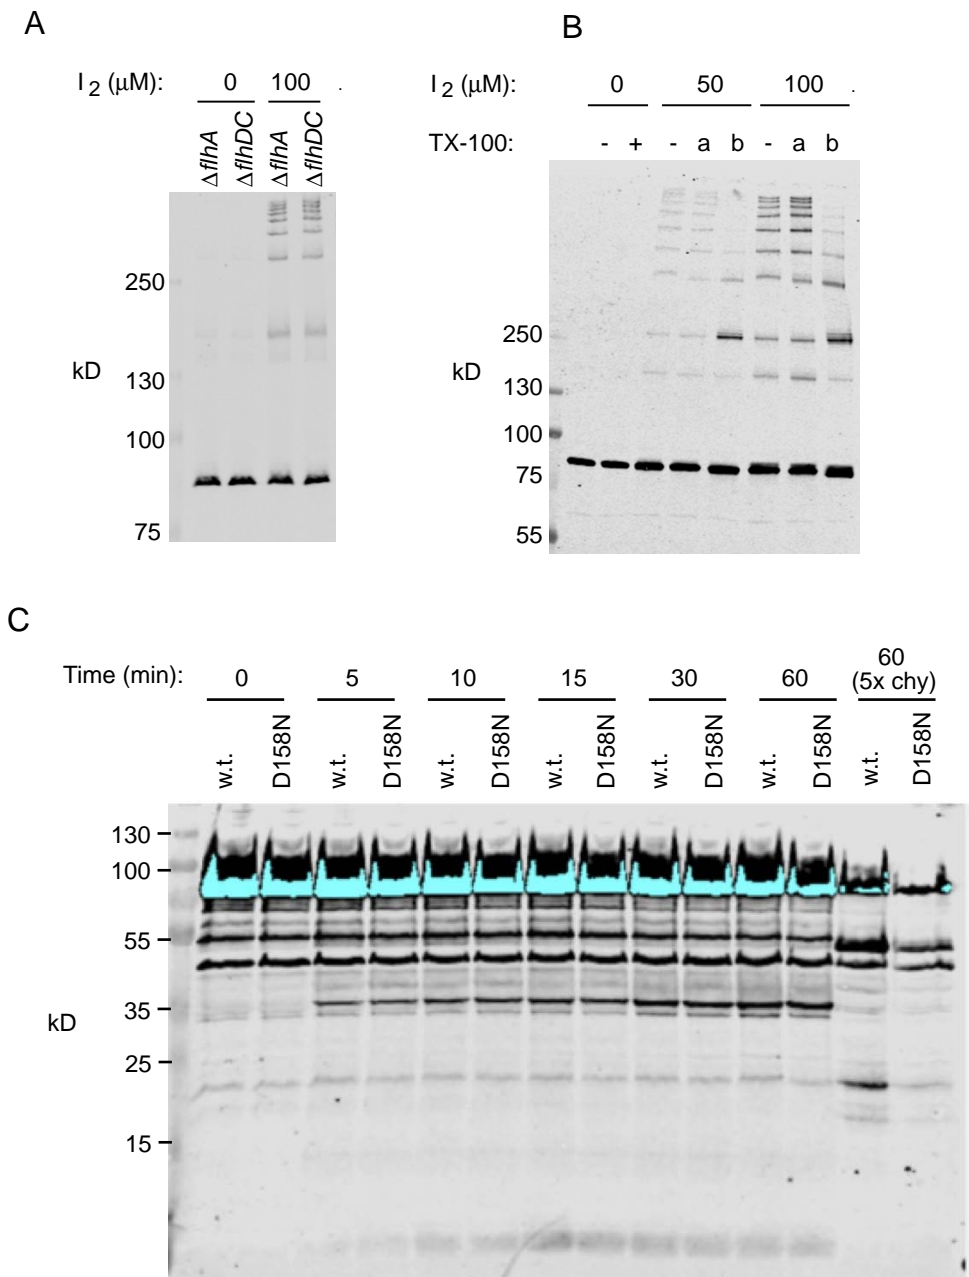

**TABLE S1.** Comparison of trans-membrane segment predictions for proteins of the flagellar export apparatus

|                   | <b>Prediction Method</b> |               |              |              |               |                |
|-------------------|--------------------------|---------------|--------------|--------------|---------------|----------------|
|                   | <b>MEMSATSM</b>          | <b>HMMTOP</b> | <b>SOSUI</b> | <b>TMHMM</b> | <b>TMpred</b> | <b>TopPRED</b> |
| <b>FlhA</b>       |                          |               |              |              |               |                |
| <b>TM segment</b> |                          |               |              |              |               |                |
| <b>1</b>          | 23-40                    | 22-41         | 19-41        | 21-43        | 21-44         | 21-41          |
| <b>2</b>          | 44-64                    | 46-64         | 44-66        | 47-64        | 46-65         | 45-65          |
| <b>3</b>          | 74-89                    | 73-97         | 72-94        | 76-98        | 68-93         | 72-92          |
| <b>4</b>          | 118-141                  | 118-142       | 122-144      | 118-140      | 123-140       | 122-142        |
| <b>5</b>          | 210-229                  | 210-229       | 208-230      | 213-235      | 209-229       | 209-229        |
| <b>6</b>          | 245-260                  | 250-269       | 248-270      | 250-272      | 244-266       | 251-271        |
| <b>7</b>          | 291-307                  | 292-316       | 298-320      | 293-315      | 310-327       | 289-309        |
| <b>8</b>          | 311-326                  |               |              |              |               |                |
| <b>(8a)</b>       |                          |               |              |              |               | 473-493        |
| <b>FlhB</b>       |                          |               |              |              |               |                |
| <b>TM segment</b> |                          |               |              |              |               |                |
| <b>1</b>          | 31-49                    | 33-50         | 33-55        | 33-50        | 33-51         | 31-51          |
| <b>(2)</b>        |                          |               | 72-94        |              |               |                |
| <b>2</b>          | 81-111                   | 91-115        | 99-121       | 93-115       | 96-117        | 88-108         |
| <b>3</b>          | 144-174                  | 146-162       | 144-166      | 146-168      | 149-168       | 144-164        |
| <b>4</b>          | 181-211                  | 189-213       | 185-207      | 189-211      | 189-207       | 187-207        |
| <b>(5)</b>        |                          |               |              |              |               | 331-351        |
| <b>FliP</b>       |                          |               |              |              |               |                |
| <b>TM segment</b> |                          |               |              |              |               |                |
| <b>1</b>          | 43-73                    | 47-71         | 48-70        | 47-69        | 45-64         | 42-62          |
| <b>2</b>          | 89-104                   | 88-105        | 87-109       | 88-105       | 88-105        | 86-106         |
| <b>3</b>          | 182-212                  | 186-210       | 184-206      | 185-207      | 193-213       | 189-209        |
| <b>4</b>          | 216-236                  | 215-239       | 213-235      | 214-236      | 223-241       | 212-232        |
| <b>FliQ</b>       |                          |               |              |              |               |                |
| <b>TM segment</b> |                          |               |              |              |               |                |
| <b>1</b>          | 13-41                    | 17-38         | 17-39        | 20-42        | 16-38         | 19-39          |
| <b>2</b>          | 51-78                    | 55-74         | 56-78        | 52-74        | 55-74         | 47-67          |
| <b>FliR</b>       |                          |               |              |              |               |                |
| <b>TM segment</b> |                          |               |              |              |               |                |
| <b>1</b>          | 9-32                     | 9-33          | 12-34        | 15-34        | 13-30         | 15-35          |
| <b>2</b>          | 42-57                    | 44-60         | 43-65        | 41-58        | 44-61         | 41-61          |
| <b>3</b>          | 70-100                   | 65-88         | 70-92        | 73-95        | 71-94         | 65-85          |
| <b>(4)</b>        |                          |               |              |              | 98-116        |                |
| <b>4</b>          | 126-155                  | 128-151       | 132-154      | 132-154      | 122-151       | 121-141        |
| <b>5</b>          | 178-207                  | 178-202       | 172-194      | 179-201      | 175-193       | 184-204        |
| <b>6</b>          | 211-241                  | 213-237       | 224-246      | 214-236      | 213-237       | 211-231        |
